# Supplementary material
Source: publisher site journal article supplement (https://www.spandidos-publications.com/5508/downloadSupplementary)
Supplement: Supplementary file 1 [file downloadSupplementary]

Table SI. Datasets meeting the inclusion criteria.

| Platform | Data source                                    | Sample size<br>(Normal/Tumor) |
|----------|------------------------------------------------|-------------------------------|
| GPL96    | GSE2361, GSE3167, GSE5287                      | 81(9/72)                      |
| GPL570   | GSE2109, GSE7476, GSE17906, GSE31189, GSE31684 | 220(51/169)                   |
| GPL6102  | GSE13507, GSE19423, GSE37815, GSE37817         | 329(80/249)                   |
| GPL14951 | GSE65635, GSE86411                             | 144(4/140)                    |
| GPL3883  | GSE19915                                       | 82(8/74)                      |
| GPL6791  | GSE24152                                       | 17(7/10)                      |
| GPL13497 | GSE40355                                       | 24(8/16)                      |
| GPL6884  | GSE52519                                       | 12(3/9)                       |
| GPL17586 | GSE76211                                       | 6(3/3)                        |
